# Supplementary material for: Diversity, Host Plants and Potential Distribution of Edible Saturniid Caterpillars in Kenya
Source: MDPI journal article supplement (doi:10.3390/insects12070600), 2021-07-01
Supplement: s1 [file s1]

## Supplementary Materials

**Table S1.** Location and agro-ecological zones of the study sites in Kenya.

| Study Site        | GPS co-ordinates      | Agro-ecological Zone |
|-------------------|-----------------------|----------------------|
| Gilgil, Nakuru    | 0.4923° S, 36.3173° E | Zone III             |
| Mbeere, Embu      | 0.5388° S, 37.4596° E | Zone II              |
| Nkubu, Meru       | 0.0647° S, 37.6679° E | Zone II              |
| Nanyuki, Laikipia | 0.0074° N, 37.0722° E | Zone IV              |
| Kasarani, Nairobi | 1.2254° S, 36.8976° E | Zone II              |
| Kibwezi, Makueni  | 2.4105° S, 37.9678° E | Zone V               |
| Kishushe, Taita   | 3.3973° S, 38.5559° E | Zone V               |
| Muhaka, Kwale     | 4.2879° S, 39.5653° E | Zone IV              |
| Malindi, Kilifi   | 3.2192° S, 40.1169° E | Zone V               |
| Mbita, Homabay    | 0.4368° S, 34.2060° E | Zone III             |
| Mwingi, Kitui     | 0.9374° S, 38.0605° E | Zone V               |
| Ngong, Kajiado    | 1.3562° S, 36.6688° E | Zone III             |
| Matuu, Machakos   | 1.1407° S, 37.5481° E | Zone IV              |
| Isiolo, Isiolo    | 0.3556° N, 37.5833° E | Zone IV              |
| Makuyu, Murang'a  | 0.9026° S, 37.1875° E | Zone II              |

**Table S2.** Accession numbers of saturniid sequences submitted to the GenBank.

|    | Sample                                  | Accession Number |
|----|-----------------------------------------|------------------|
| 1  | SUB7133105 S17_Gzambesina_Kilifi        | MT176774         |
| 2  | SUB7133105 S18_Gzambesina_Kilifi        | MT176775         |
| 3  | SUB7133105 S79_Gzambesina_Kambiti       | MT176776         |
| 4  | SUB7133105 S95_Gzambesina_Embu          | MT176777         |
| 5  | SUB7133105 S97_Brown_Gzambesina_Makuyu  | MT176778         |
| 6  | SUB7133105 S98_Brown_Gzambesina_Makuyu  | MT176779         |
| 7  | SUB7133105 S99_Green_Gzambesina_Makuyu  | MT176780         |
| 8  | SUB7133105 S100_Green_Gzambesina_Makuyu | MT176781         |
| 9  | SUB7133105 S101_Green_Gzambesina_Makuyu | MT176782         |
| 10 | SUB7133105 S102_Green_Gzambesina_Makuyu | MT176783         |
| 11 | SUB7133105 S104_Brown_Gzambesina_Makuyu | MT176784         |
| 12 | SUB7133105 S105_Brown_Gzambesina_Makuyu | MT176785         |
| 13 | SUB7133105 S107_Brown_Gzambesina_Makuyu | MT176786         |
| 14 | SUB7133102 S48_Gufipana_Muhaka          | MT176766         |
| 15 | SUB7108149 S22_Gcocaulti_Matuu          | MT159807         |
| 16 | SUB7108149 S28_Gcocaulti_Matuu          | MT159808         |
| 17 | SUB7108149 S30_Gcocaulti_Mwingi         | MT159809         |
| 18 | SUB7108149 S32_Gcocaulti_Taita          | MT159810         |
| 19 | SUB7108149 S33_Gcocaulti_Taita          | MT159811         |
| 20 | SUB7108149 S34_Gcocaulti_Taita          | MT159812         |
| 21 | SUB7108145 IBB1_Gbelina                 | MT157403         |
| 22 | SUB7108145 IBB2_Gbelina                 | MT157404         |
| 23 | SUB7133102 S48_Gufipana_Muhaka          | MT176766         |
| 24 | SUB7074604 Nigeria1_Balcinoe            | MT179695         |
| 25 | SUB7074604 S84_Balcinoe_Matuu           | MT179696         |
| 26 | SUB7074604 S85_Balcinoe_Matuu           | MT179697         |
| 27 | SUB7074604 S87_Balcinoe_Nanyuki         | MT179698         |
| 28 | SUB7074604 S88_Balcinoe_Nanyuki         | MT179699         |
| 29 | SUB7074604 S90_Balcinoe_Mbita           | MT179700         |
| 30 | SUB7074604 S91_Balcinoe_Mbita           | MT179701         |
| 31 | SUB7074604 S92_Balcinoe_Embu            | MT179702         |
| 32 | SUB7074604 S93_Balcinoe_Embu            | MT179703         |

|    |                               |          |
|----|-------------------------------|----------|
| 33 | SUB7074617 2CF_Cforda_Ngong   | MT179704 |
| 34 | SUB7074617 5CF_Cforda_Ngong   | MT179705 |
| 35 | SUB7074617 S6_Cforda_Mbita    | MT179706 |
| 36 | SUB7074617 S7_Cforda_Mbita    | MT179707 |
| 37 | SUB7074617 S54_Cforda_Gilgil  | MT179708 |
| 38 | SUB7074617 S55_Cforda_Kilifi  | MT179709 |
| 39 | SUB7138372 GM1_Gwestwoodi     | MT182818 |
| 40 | SUB7138372 GM1_Gwestwoodi     | MT182818 |
| 41 | SUB7138303 GMB2_Gnigra        | MT179594 |
| 42 | SUB7133097 S2_Gkrucki_Nairobi | MT178412 |
| 43 | SUB7133097 S3_Gkrucki_Nairobi | MT178413 |

**Table S3.** Pairwise genetic distances of *Gonimbrasia zambesina* samples.

| Samples     | KAG 94 | EMG 95 | MAB 97 | MAB 98 | MAG 99 | MAG1 00 | MAG1 01 | MAG1 02 | MAB1 04 | MAB1 05 | MAB1 06 | MAB1 07 | KFG 17 | KFG 18 | KAG 79 | SAPBA77 3-07 | SAPBA77 2-07 |
|-------------|--------|--------|--------|--------|--------|---------|---------|---------|---------|---------|---------|---------|--------|--------|--------|--------------|--------------|
| KAG94       | 0.00%  |        |        |        |        |         |         |         |         |         |         |         |        |        |        |              |              |
| EMG95       | 0.00%  | 0.00%  |        |        |        |         |         |         |         |         |         |         |        |        |        |              |              |
| MAB97       | 0.15%  | 0.15%  | 0.00%  |        |        |         |         |         |         |         |         |         |        |        |        |              |              |
| MAB98       | 0.15%  | 0.15%  | 0.00%  | 0.00%  |        |         |         |         |         |         |         |         |        |        |        |              |              |
| MAG99       | 0.15%  | 0.15%  | 0.00%  | 0.00%  | 0.00%  |         |         |         |         |         |         |         |        |        |        |              |              |
| MAG100      | 0.15%  | 0.15%  | 0.00%  | 0.00%  | 0.00%  | 0.00%   |         |         |         |         |         |         |        |        |        |              |              |
| MAG101      | 0.30%  | 0.30%  | 0.15%  | 0.15%  | 0.15%  | 0.15%   | 0.00%   |         |         |         |         |         |        |        |        |              |              |
| MAG102      | 0.30%  | 0.30%  | 0.15%  | 0.15%  | 0.15%  | 0.15%   | 0.31%   | 0.00%   |         |         |         |         |        |        |        |              |              |
| MAB104      | 0.30%  | 0.30%  | 0.15%  | 0.15%  | 0.15%  | 0.15%   | 0.31%   | 0.31%   | 0.00%   |         |         |         |        |        |        |              |              |
| MAB105      | 0.15%  | 0.15%  | 0.00%  | 0.00%  | 0.00%  | 0.00%   | 0.15%   | 0.15%   | 0.15%   | 0.00%   |         |         |        |        |        |              |              |
| MAB106      | 0.15%  | 0.15%  | 0.00%  | 0.00%  | 0.00%  | 0.00%   | 0.15%   | 0.15%   | 0.15%   | 0.00%   | 0.00%   |         |        |        |        |              |              |
| MAB107      | 0.30%  | 0.30%  | 0.15%  | 0.15%  | 0.15%  | 0.15%   | 0.31%   | 0.31%   | 0.31%   | 0.15%   | 0.15%   | 0.00%   |        |        |        |              |              |
| KFG17       | 0.61%  | 0.61%  | 0.46%  | 0.46%  | 0.46%  | 0.46%   | 0.61%   | 0.61%   | 0.61%   | 0.46%   | 0.46%   | 0.61%   | 0.00%  |        |        |              |              |
| KFG18       | 0.61%  | 0.61%  | 0.46%  | 0.46%  | 0.46%  | 0.46%   | 0.61%   | 0.61%   | 0.61%   | 0.46%   | 0.46%   | 0.61%   | 0.00%  | 0.00%  |        |              |              |
| KAG79       | 0.15%  | 0.15%  | 0.00%  | 0.00%  | 0.00%  | 0.00%   | 0.15%   | 0.15%   | 0.15%   | 0.00%   | 0.00%   | 0.15%   | 0.46%  | 0.46%  | 0.00%  |              |              |
| SAPBA773-07 | 0.61%  | 0.61%  | 0.46%  | 0.46%  | 0.46%  | 0.46%   | 0.61%   | 0.61%   | 0.61%   | 0.46%   | 0.46%   | 0.61%   | 0.00%  | 0.00%  | 0.46%  | 0.00%        |              |
| SAPBA772-07 | 1.22%  | 1.22%  | 1.07%  | 1.07%  | 1.07%  | 1.07%   | 1.23%   | 1.23%   | 1.23%   | 1.07%   | 1.07%   | 1.23%   | 1.22%  | 1.22%  | 1.07%  | 1.22%        | 0.00%        |

**Table S4.** Pairwise genetic distances of *Bunaea alcinoe* samples.

| Samples            | NGR 1 | SATWA891-07.COI-5P | MAB8 4 | MAB8 5 | MAB8 6 | NAB8 7 | NAB8 8 | MBB9 0 | MBB9 1 | EMB9 2 | EMB9 3 | LSAFR2238-12 |
|--------------------|-------|--------------------|--------|--------|--------|--------|--------|--------|--------|--------|--------|--------------|
| NGR1               | 0.00% |                    |        |        |        |        |        |        |        |        |        |              |
| SATWA891-07.COI-5P | 0.00% | 0.00%              |        |        |        |        |        |        |        |        |        |              |
| MAB84              | 3.60% | 3.60%              | 0.00%  |        |        |        |        |        |        |        |        |              |
| MAB85              | 3.44% | 3.44%              | 0.15%  | 0.00%  |        |        |        |        |        |        |        |              |
| MAB86              | 3.44% | 3.44%              | 0.15%  | 0.00%  | 0.00%  |        |        |        |        |        |        |              |
| NAB87              | 3.28% | 3.28%              | 0.30%  | 0.15%  | 0.15%  | 0.00%  |        |        |        |        |        |              |
| NAB88              | 3.28% | 3.28%              | 0.30%  | 0.15%  | 0.15%  | 0.00%  | 0.00%  |        |        |        |        |              |
| MBB90              | 3.44% | 3.44%              | 0.15%  | 0.00%  | 0.00%  | 0.15%  | 0.15%  | 0.00%  |        |        |        |              |
| MBB91              | 3.45% | 3.45%              | 0.46%  | 0.31%  | 0.31%  | 0.15%  | 0.15%  | 0.31%  | 0.00%  |        |        |              |
| EMB92              | 3.28% | 3.28%              | 0.31%  | 0.15%  | 0.15%  | 0.00%  | 0.00%  | 0.15%  | 0.15%  | 0.00%  |        |              |
| EMB93              | 3.76% | 3.76%              | 0.77%  | 0.61%  | 0.61%  | 0.46%  | 0.46%  | 0.61%  | 0.61%  | 0.46%  | 0.00%  |              |
| LSAFR2238-12       | 3.76% | 3.76%              | 0.76%  | 0.61%  | 0.61%  | 0.76%  | 0.76%  | 0.61%  | 0.92%  | 0.76%  | 1.23%  | 0.00%        |
